# Supplementary material for: Current-assisted magnetization reversal in Fe3GeTe2 van der Waals homojunctions
Source: Royal Society of Chemistry journal article supplement (doi:10.1039/d1nr07730a), 2022-01-01
Supplement: d1nr07730a1.pdf [file d1nr07730a1.pdf]

**Supplementary Information for**

**Current-assisted magnetization reversal in Fe<sub>3</sub>GeTe<sub>2</sub> van der Waals  
homojunctions**

Hailong Lin,<sup>1,2</sup> Faguang Yan,<sup>1</sup> Ce Hu,<sup>1,2</sup> Yuanhui Zheng,<sup>3</sup> Yu Sheng,<sup>1</sup> Wenkai Zhu,<sup>1,2</sup> Ziao Wang,<sup>1,2</sup> Houzhi Zheng,<sup>1,2</sup> and Kaiyou Wang<sup>1,2,3\*</sup>

**Affiliations**

1. State Key Laboratory of Superlattices and Microstructures, Institute of Semiconductors, Chinese Academy of Sciences, Beijing 100083, China
2. Center of Materials Science and Optoelectronics Engineering, University of Chinese Academy of Sciences, Beijing 100049, China
3. Beijing Academy of Quantum Information Sciences, Beijing 100193, China

**Corresponding Author**

\*E-mail: kywang@semi.ac.cn

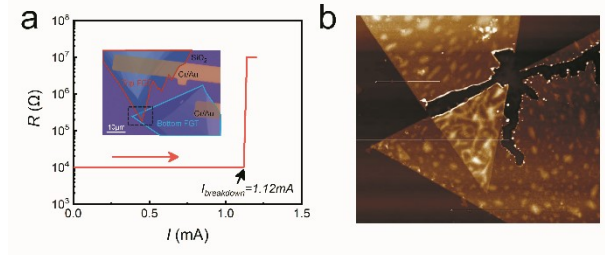

Fig. S1 The FGT/FGT homojunction damaged by a large pulse current. (a) The sample is damaged when the pulse current reaches 1.12 mA. The inset is the optical image of the sample. (b) AFM image of the sample after breakdown.

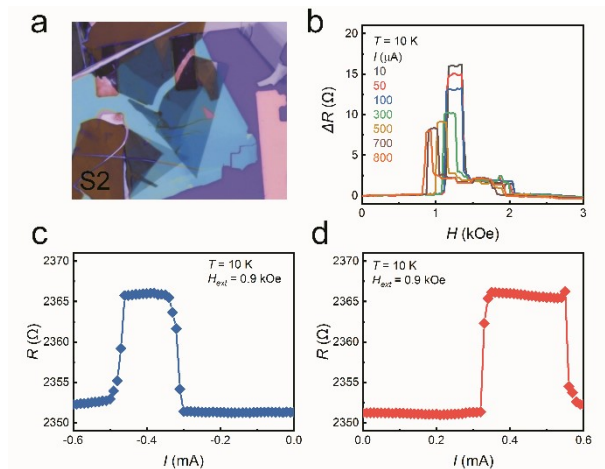

Fig. S2 The R-H curve and current-assisted magnetization reversal of sample 2. (a) The optical image of the sample. (b) The R-H curves under different bias currents at 10 K. The  $H_C$  are 1.11 and 1.41 kOe at 10 K. Magnetization reversal caused by negative (c) and positive (d) currents under a magnetic field of 0.9 kOe at 10 K.

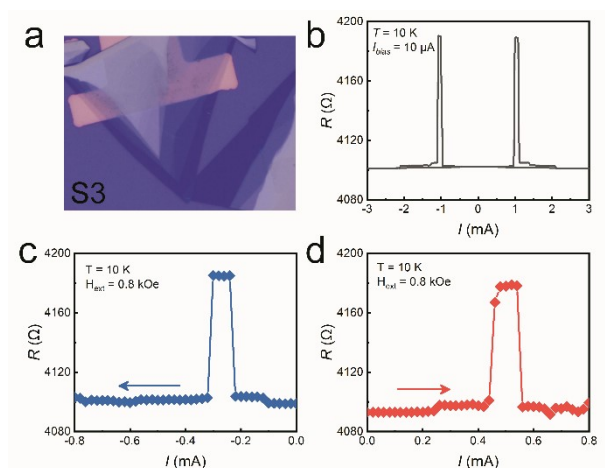

Fig. S3 The R-H curve and current-assisted magnetization reversal of sample 3. (a) The optical image of the sample. (b) The R-H curve at 10 K. The  $H_C$  are 0.99 and 1.11 kOe. Magnetization reversal caused by negative (c) and positive (d) currents under a magnetic field of 0.8 kOe at 10 K.

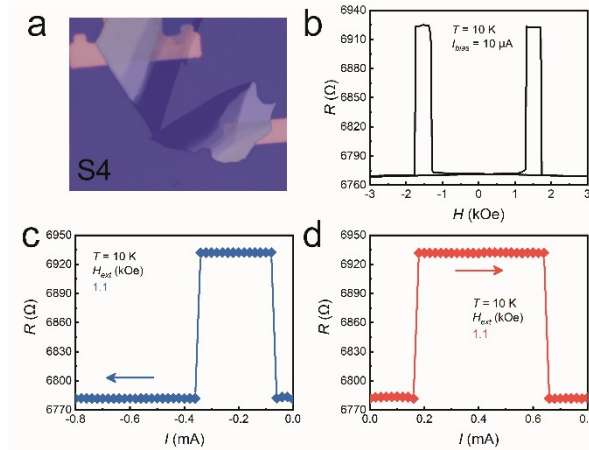

Fig. S4 The R-H curve and current-assisted magnetization reversal of sample 4. (a) The optical image of the sample. (b) The R-H curve at 10 K. The  $H_C$  are 1.32 and 1.74 kOe. Magnetization reversal caused by negative (c) and positive (d) currents under a magnetic field of 1.1 kOe at 10 K.

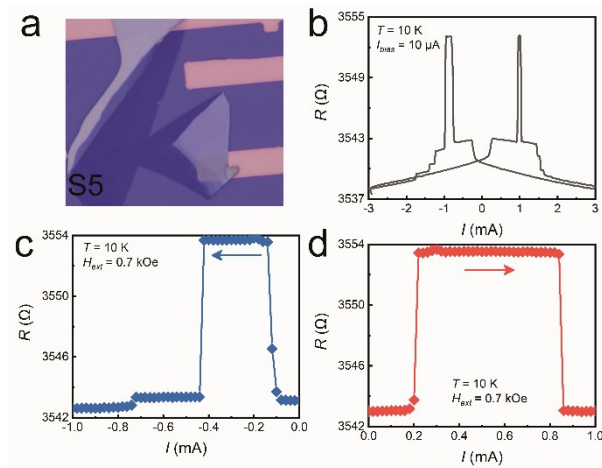

Fig. S5 The R-H curve and current-assisted magnetization reversal of sample 5. (a) The optical image of the sample. (b) The R-H curve at 10 K. The  $H_C$  are 0.96 and 1.05 kOe. Magnetization reversal caused by negative (c) and positive (d) currents under a magnetic field of 0.7 kOe at 10 K.

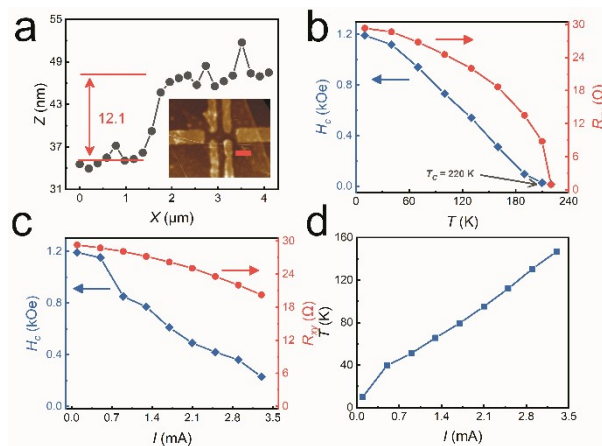

Fig. S6  $H_C$  and  $R_{xy}$  of FGT Hall bar versus temperature and current. (a) The height profile scanned

by AFM and the inset is the AFM image of the sample. (b) The  $H_C$  and  $R_{xy}$  extracted from Fig. 3b versus temperature. (c) The  $H_C$  and  $R_{xy}$  extracted from Fig. 3c versus current. (d) After considering the Joule heat, the corresponding device temperature with applied current intensity.

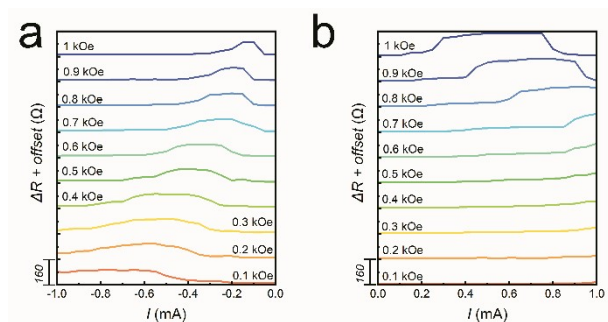

Fig. S7 Current-assisted magnetization reversal under the external  $H$  range of 0.1 to 1 kOe at 10 K. The  $\Delta R$  versus the negative (a) and positive (b) pulse currents.

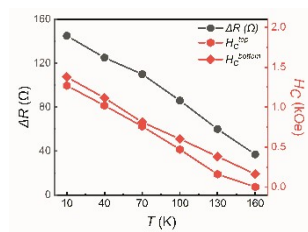

Fig. S8 The  $\Delta R$  and  $H_C$  as a function of temperature extracted from Fig. 4c.

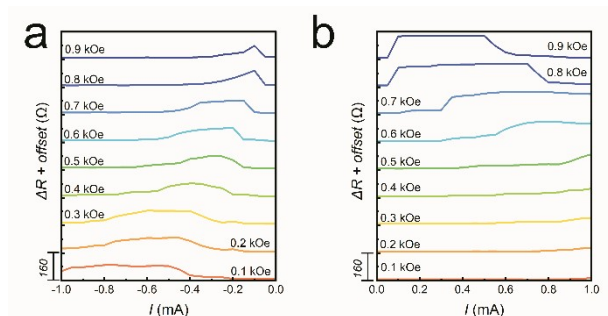

Fig. S9 Current-assisted magnetization reversal under the external  $H$  range of 0.1 to 0.9 kOe at 40 K. The  $\Delta R$  versus the negative (a) and positive (b) pulse currents.

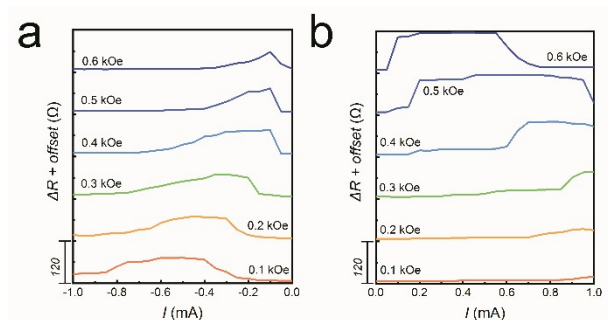

Fig. S10 Current-assisted magnetization reversal under the external  $H$  range of 0.1 to 0.6 kOe at 70 K. The  $\Delta R$  versus the negative (a) and positive (b) pulse currents.

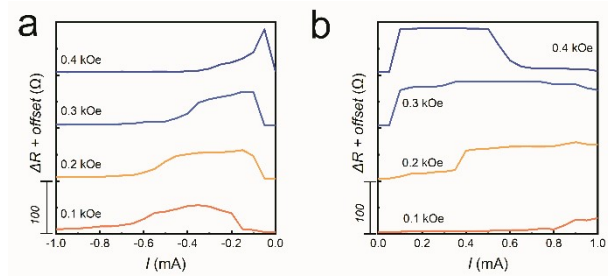

Fig. S11 Current-assisted magnetization reversal under the external  $H$  range of 0.1 to 0.4 kOe at 100 K. The  $\Delta R$  versus the negative (a) and positive (b) pulse currents.

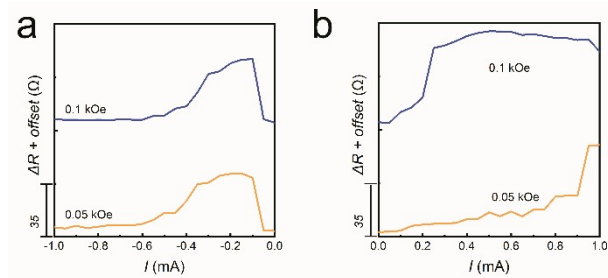

Fig. S12 Current-assisted magnetization reversal under the external  $H$  range of 0.05 to 0.1 kOe at 130 K. The  $\Delta R$  versus the negative (a) and positive (b) pulse currents.
